# Supplementary material for: Staphylococcus aureus Small-Colony Variants from Airways of Adult Cystic Fibrosis Patients as Precursors of Adaptive Antibiotic-Resistant Mutations
Source: MDPI journal article supplement (doi:10.3390/antibiotics12061069), 2023-06-17
Supplement: s1 [file s1]

**Table S3.** High- and moderate-impact SNP mutations found in CF28A-L, CF63A-L and CF63A-S isolates showing changes in antibiotic susceptibility over time.

| Isolate | Patient 3 visit | Antibiotic resistance <sup>a</sup> | Gene altered                                              | Mutation found                           |
|---------|-----------------|------------------------------------|-----------------------------------------------------------|------------------------------------------|
| CF28A-L | V2              | None                               | NWMN_0456 <i>ksgA</i> ; dimethyladenosine transferase     | Frameshift removing the initiation codon |
| CF63A-S | V3              | TOB (R), ERY (R)                   | NWMN_0456 <i>ksgA</i> ; dimethyladenosine transferase     | Frameshift removing the initiation codon |
| CF63A-L | V3              | TOB (R), GEN (I), ERY (R), CIP (R) | NWMN_2096 <i>lacD</i> ; tagatose 1,6-diphosphate aldolase | 730C>T; Pro244Ser                        |

<sup>a</sup> TOB, tobramycin; GEN, gentamicin; ERY, erythromycin; CIP, ciprofloxacin; R, resistant; I, intermediate. See precise minimal inhibitory concentrations in Table S1.
