# Supplementary material for: Staphylococcus aureus Small-Colony Variants from Airways of Adult Cystic Fibrosis Patients as Precursors of Adaptive Antibiotic-Resistant Mutations
Source: MDPI journal article supplement (doi:10.3390/antibiotics12061069), 2023-06-17
Supplement: s1 [file s1]

| TABLE S1. Clonal diversity and antibiotic minimal inhibitory concentrations (MICs) for 77 <i>S. aureus</i> isolates from 18 adult CF patients. |       |               |         |      |     |                                          |          |          |                      |           |           |           |           |       |             |     |
|------------------------------------------------------------------------------------------------------------------------------------------------|-------|---------------|---------|------|-----|------------------------------------------|----------|----------|----------------------|-----------|-----------|-----------|-----------|-------|-------------|-----|
| Patient                                                                                                                                        | Visit | First isolate | Variant | MLVA | Agr | Minimal inhibitory concentration (µg/ml) |          |          |                      |           |           |           |           |       |             | Aux |
|                                                                                                                                                |       |               |         |      |     | OXA <sup>a</sup>                         | TOB      | GEN      | TMP-SXT <sup>b</sup> | CIP       | ERY       | CLI       | TET       | VAN   | RIF         |     |
|                                                                                                                                                |       | ATCC 29213    |         |      |     | 0.25                                     | 1        | 1        | 0.5/9.5              | 0.5       | 0.25-0.5  | 0.12      | 0.12-0.5  | 1-2   | 0.015       |     |
|                                                                                                                                                |       |               |         |      |     |                                          |          |          |                      |           |           |           |           |       |             |     |
| 1                                                                                                                                              | V1    | CF1A-L        |         | A    | 2   | 0.5                                      | 0.5-1    | 0.25-0.5 | 0.06/1.2             | 0.12-0.25 | 0.06-0.12 | 0.12      | 0.06-0.12 | 1-2   | 0.008-0.02  |     |
| 1                                                                                                                                              | V1    |               | CF1C-S  | A    | 2   | 0.25-0.5                                 | 4-8 (I)  | 4-8 (I)  | 0.5/9.5              | 0.25      | 0.12      | 0.12      | 0.12      | 2     | 0.015       | H   |
| 1                                                                                                                                              | V1    |               | CF1D-S  | A    | 2   | NT                                       | 8 (I)    | 2        | NT                   | 0.12      | 0.06-0.12 | >32 (R)   | 0.06-0.25 | 2     | 0.003-0.025 | U   |
| 1                                                                                                                                              | V2    |               | CF37B-S | A    | 2   | 1                                        | 4-8 (I)  | 4-8 (I)  | 1/19                 | >64       | >64 (R)   | NT        | 0.06-0.12 | 2     | 0.008-0.015 | U   |
| 1                                                                                                                                              | V3    |               | CF54A-L | A    | 2   | 0.25-0.5                                 | 2-4      | 2-4      | 1/19                 | 0.5       | 0.25-0.5  | NT        | 0.12-0.25 | 1     | 0.015-0.03  |     |
| 1                                                                                                                                              | V4    |               | CF54A-S | A    | 2   | 0.5                                      | >32 (R)  | >32 (R)  | 1/19-2/38            | 0.5       | 0.25      | NT        | 0.12-0.25 | 1     | 0.015-0.03  | U   |
| 1                                                                                                                                              | V2    | CF37A-L       |         | B    | 2   | >128 (R)                                 | 2-4      | 1-2      | 0.5/9.5-1/19         | >64       | >64 (R)   | NT        | 0.12-0.25 | 2     | 0.015-0.03  |     |
| 1                                                                                                                                              | V2    |               | CF37A-S | B    | 2   | >128 (R)                                 | 1        | 0.5-1    | 1/19                 | >64       | >64 (R)   | NT        | 0.12-0.5  | 2     | 0.015-0.03  | U   |
|                                                                                                                                                |       |               |         |      |     |                                          |          |          |                      |           |           |           |           |       |             |     |
| 2                                                                                                                                              | V1    | CF2A-L        |         | C    | 1   | 0.5                                      | 0.25-0.5 | 0.25-1   | 0.06/1.2             | 0.25-0.5  | 0.25-0.5  | 0.12      | 0.5-2     | 0.5-1 | 0.025-0.06  |     |
| 2                                                                                                                                              | V3    |               | CF62B-L | C    | 1   | 1                                        | 2-4      | 1-4      | 1/19                 | 0.5-1     | 0.25      | NT        | 1-2       | 2     | 0.015       |     |
| 2                                                                                                                                              | V1    | CF2C-L        |         | D    | 3   | 0.5                                      | 2        | 2        | 0.03/0.6             | 0.12      | 0.12      | 0.12      | 0.25      | 1     | 0.004       |     |
| 2                                                                                                                                              | V1    |               | CF2B-S  | D    | 3   | 0.5                                      | 4-8 (I)  | 4        | 0.12/2.4             | 0.12-0.25 | 0.06-0.25 | 0.12      | 0.06-0.12 | 1-2   | 0.015-0.06  | H   |
| 2                                                                                                                                              | V3    |               | CF62A-L | D    | 3   | 1                                        | 2-8      | 4        | 1/19                 | 0.5       | 0.25      | NT        | 0.25      | 2-4   | 0.015       |     |
| 2                                                                                                                                              | V2    | CF34A-L       |         | E    | 1   | 0.5                                      | 2        | 0.5-2    | 0.06/1.2             | 0.25-0.5  | 0.12-0.5  | NT        | 0.03-1    | 2     | 0.015-0.03  |     |
| 2                                                                                                                                              | V2    | CF34B-L       |         | F    | 3   | 1                                        | 1        | 0.5-1    | 0.06/1.2             | 0.5       | 0.25      | NT        | 0.06-0.12 | 1-2   | 0.004-0.008 |     |
|                                                                                                                                                |       |               |         |      |     |                                          |          |          |                      |           |           |           |           |       |             |     |
| 3                                                                                                                                              | V1    | CF4B-L        |         | A    | 2   | 0.5-1                                    | 1        | 1        | 0.06/1.2             | 0.5       | 0.25-0.5  | 0.12      | 0.12-0.5  | 1-2   | 0.015       |     |
| 3                                                                                                                                              | V1    |               | CF4B-S  | A    | 2   | 0.5                                      | 4-8 (I)  | 1-8 (I)  | 0.06/1.2             | 0.5       | 0.06-0.12 | <0.06     | 0.03-0.06 | 2     | 0.03-0.05   | M   |
| 3                                                                                                                                              | V2    |               | CF28B-L | A    | 2   | 1                                        | 1        | 1        | 0.06/1.2             | 0.25-0.5  | 0.25-0.5  | NT        | 0.06      | 2     | 0.008-0.015 |     |
| 3                                                                                                                                              | V2    | CF28A-L       |         | G    | 2   | 2                                        | 0.5      | 0.5      | 0.03/0.6             | 0.25      | >64 (R)   | NT        | 0.12      | 0.5-1 | 0.008-0.015 |     |
| 3                                                                                                                                              | V3    |               | CF63A-S | G    | 2   | 1                                        | >32 (R)  | 4        | 1/19                 | 0.25-1    | >64 (R)   | NT        | 0.12-0.25 | 1     | 0.015       | U   |
| 3                                                                                                                                              | V3    |               | CF63A-L | G    | 2   | 1                                        | >32 (R)  | 8 (I)    | 1/19                 | 16 (R)    | >64 (R)   | NT        | 0.12-0.25 | 1-2   | 0.015-0.03  |     |
|                                                                                                                                                |       |               |         |      |     |                                          |          |          |                      |           |           |           |           |       |             |     |
| 4                                                                                                                                              | V1    | CF5A-L        |         | H    | 3   | 0.25                                     | 0.5      | 0.25     | 0.03/0.6             | 1-2       | 0.03-0.12 | 0.12-0.25 | 0.03-0.06 | 1     | 0.03-0.05   |     |
| 4                                                                                                                                              | V1    |               | CF5C-S  | H    | 3   | NT                                       | 4-8 (I)  | 8 (I)    | 0.06/1.2             | 0.5-1     | 0.062     | 0.12      | 0.03-1    | 1     | 0.002-0.015 | U   |
| 4                                                                                                                                              | V1    | CF5E-S        |         | I    | 3   | 0.12                                     | 8 (I)    | 8 (I)    | 0.03/0.6             | 1         | 0.062     | 0.12      | 0.06      | 2     | 0.002       | H+M |
|                                                                                                                                                |       |               |         |      |     |                                          |          |          |                      |           |           |           |           |       |             |     |
| 5                                                                                                                                              | V1    | CF6B-L        |         | J    | 3   | 0.5                                      | >32 (R)  | >32 (R)  | 0.12/2.4             | 2         | 0.25      | 0.06      | 0.06-0.12 | 1     | 0.008-0.015 |     |
| 5                                                                                                                                              | V1    |               | CF6A-S  | J    | 3   | 0.5                                      | >32 (R)  | >32 (R)  | 8/152 (R)            | 0.25-0.5  | 0.5       | 0.12-0.25 | 0.12-0.25 | 2     | 0.015-0.03  | T   |
| 5                                                                                                                                              | V1    |               | CF6C-S  | J    | 3   | 0.5                                      | >32 (R)  | >32 (R)  | 0.25/4.8             | 0.25      | 0.25      | 0.12      | 0.06-0.12 | 1     | 0.008-0.015 | H+M |
| 5                                                                                                                                              | V2    |               | CF39A-L | J    | 3   | 0.5                                      | >32 (R)  | >32 (R)  | 8/152 (R)            | 2         | 0.5-1     | NT        | 0.25      | 1     | 0.03        |     |
| 5                                                                                                                                              | V2    |               | CF39A-S | J    | 3   | 0.25                                     | >32 (R)  | >32 (R)  | 8/152 (R)            | 2         | 0.5-1     | NT        | 0.25      | 1     | 0.015-0.03  | U   |
|                                                                                                                                                |       |               |         |      |     |                                          |          |          |                      |           |           |           |           |       |             |     |
| 6                                                                                                                                              | V1    | CF7A-L        |         | K    | 2   | >128 (R)                                 | >32 (R)  | 0.5      | 0.06/1.2             | >64 (R)   | >64 (R)   | >32 (R)   | 0.06-0.12 | 1-2   | 0.015-0.03  |     |
| 6                                                                                                                                              | V1    |               | CF7D-L  | K    | 2   | 0.25                                     | 0.5      | 0.5      | 0.03/0.6             | >64 (R)   | >64 (R)   | >32 (R)   | 0.06-0.12 | 1     | 0.015-0.03  |     |
| 6                                                                                                                                              | V2    |               | CF27A-L | K    | 2   | >128 (R)                                 | >32 (R)  | 2-4      | 0.5/9.5-1/19         | >64 (R)   | >64 (R)   | NT        | 0.12-0.25 | 2     | 0.015-0.06  |     |
| 6                                                                                                                                              | V3    | CF49A-L       |         | L    | 3   | 0.25                                     | 4        | 2-4      | 0.5/9.5-1/19         | 1         | 0.25-0.5  | NT        | 0.12-0.25 | 2-4   | 0.03        |     |
| 6                                                                                                                                              | V3    |               | CF49A-S | M    | 3   | 0.25                                     | 8 (I)    | 4        | 0.06/1.2             | 0.12-0.25 | 0.25-0.5  | NT        | 0.03-0.06 | 2     | 0.03        | H   |
| 6                                                                                                                                              | V3    |               | CF49B-S | M    | 3   | 0.25-0.5                                 | 8 (I)    | 4        | 1/19                 | 0.5-1     | 0.25-0.5  | NT        | 0.25-1    | 2-4   | 0.015-0.12  | U   |
|                                                                                                                                                |       |               |         |      |     |                                          |          |          |                      |           |           |           |           |       |             |     |
| 7                                                                                                                                              | V1    | CF8A-L        |         | N    | 3   | 0.25                                     | 0.5      | 0.5      | 0.06/1.2             | 1         | 1 (I)     | 0.12      | 0.5       | 2     | 0.008       |     |
| 7                                                                                                                                              | V2    |               | CF21A-L | N    | 3   | 0.25                                     | 1        | 1-2      | 1/19                 | 0.25-0.5  | 0.25      | NT        | 0.06-0.5  | 1     | 0.008-0.03  |     |
| 7                                                                                                                                              | V2    |               | CF21A-S | N    | 3   | 0.125                                    | 4        | 2        | 1/19                 | 0.25      | 0.125     | NT        | 0.5       | 1-2   | 0.015       | M   |
| 7                                                                                                                                              | V1    | CF8C-L        |         | O    | 3   | 0.5                                      | 1-2      | 1-2      | 0.06/1.2             | 0.25-0.5  | 0.25      | 0.12-0.25 | 0.12-0.25 | 2-4   | 0.008-0.06  |     |
| 7                                                                                                                                              | V1    |               | CF21D-L | O    | 3   | 0.5-1                                    | 2        | 0.5-1    | 2/38                 | 4         | 0.25      | NT        | 0.12-0.25 | 1-2   | 0.015-0.12  |     |
| 7                                                                                                                                              | V1    | CF8D-L        |         | P    | 3   | 0.12                                     | 4        | 4        | 0.06/1.2             | 0.25      | 0.25      | 0.12-0.25 | 0.12      | 2-4   | 0.004       |     |
| 7                                                                                                                                              | V3    | CF48A-L       |         | K    | 2   | >128 (R)                                 | >32 (R)  | 1        | 0.25/4.8             | >64 (R)   | >64 (R)   | NT        | 0.12-0.25 | 2-4   | 0.03        |     |
| 7                                                                                                                                              | V3    |               | CF48A-S | K    | 2   | 64 (R)                                   | >32 (R)  | 2-4      | 0.5/9.5              | >64 (R)   | >64 (R)   | NT        | 0.12-0.25 | 1-2   | 0.008-0.06  | U   |
| 7                                                                                                                                              | V3    |               | CF48B-S | K    | 2   | 0.25                                     | >32 (R)  | 8 (I)    | 1/19                 | >64 (R)   | >64 (R)   | NT        | 0.12-0.25 | 4 (I) | 0.015-0.03  | U   |

| Patient            | Visit | First isolate          | Variant | MLVA | Agr | Minimal inhibitory concentration (µg/ml) |          |         |                      |           |           |                       |           |         |             | Aux |
|--------------------|-------|------------------------|---------|------|-----|------------------------------------------|----------|---------|----------------------|-----------|-----------|-----------------------|-----------|---------|-------------|-----|
|                    |       |                        |         |      |     | OXA <sup>a</sup>                         | TOB      | GEN     | TMP-SXT <sup>b</sup> | CIP       | ERY       | CLI                   | TET       | VAN     | RIF         |     |
|                    |       | ATCC 29213             |         |      |     | 0.25                                     | 1        | 1       | 0.5/9.5              | 0.5       | 0.25-0.5  | 0.12                  | 0.12-0.5  | 1-2     | 0.015       |     |
|                    |       |                        |         |      |     |                                          |          |         |                      |           |           |                       |           |         |             |     |
| 8                  | V1    | CF9A-L                 |         | K    | 2   | >128 (R)                                 | >32 (R)  | 0.5-2   | 0.06/1.2             | >64 (R)   | >64 (R)   | 0.12 (R) <sup>c</sup> | 0.06-0.25 | 1       | 0.03-0.06   |     |
| 8                  | V1    |                        | CF9F-L  | K    | 2   | 0.5                                      | >32 (R)  | >32 (R) | 0.06/1.2             | >64 (R)   | >64 (R)   | 2 (I)                 | 0.25-0.5  | 0.5-2   | 0.015-0.06  |     |
| 8                  | V2    | CF51A-L                |         | p    | 2   | 0.25                                     | 2-8      | 2-4     | 0.5/9.5              | >64 (R)   | >64 (R)   | NT                    | 1         | 2       | 0.015-0.03  |     |
| 8                  | V2    |                        | CF51B-S | p    | 2   | 0.25                                     | 8-16 (I) | 4-8 (I) | 0.5/9.5-1/19         | >64 (R)   | >64 (R)   | NT                    | 0.5-1     | 4 (I)   | 0.015-0.03  | U   |
| 8                  | V3    |                        | CF75B-L | P    | 2   | 0.25                                     | 1-4      | 1-2     | 0.5/9.5              | >64 (R)   | >64 (R)   | NT                    | 0.5-1     | 1-2     | 0.03-0.06   |     |
| 8                  | V3    | CF75A-L                |         | Q    | 1   | 1                                        | 2        | 1       | 0.5/9.5              | >64 (R)   | 0.5       | NT                    | 0.25-0.5  | 2-4     | 0.015       |     |
|                    |       |                        |         |      |     |                                          |          |         |                      |           |           |                       |           |         |             |     |
| 9                  | V1    | CF10B-L                |         | R    | 1   | 1                                        | 0.5-1    | 0.5-1   | 0.12/2.4             | 0.12-0.5  | >64 (R)   | 16-32 (R)             | 0.12-0.25 | 1       | 0.008-0.03  |     |
| 9                  | V1    |                        | CF10A-S | R    | 1   | 0.25                                     | >32 (R)  | >32 (R) | 0.06/1.2             | 0.25      | >64 (R)   | 16-32 (R)             | 0.06      | 1-2     | 0.008       | H+M |
|                    |       |                        |         |      |     |                                          |          |         |                      |           |           |                       |           |         |             |     |
| 10                 | V1    | CF18A-L                |         | S    | 2   | 0.5                                      | 1-4      | 0.5-4   | 0.03/0.6             | 0.12-0.5  | >64 (R)   | 0.12 (R) <sup>c</sup> | 0.12-0.25 | 1       | 0.008-0.015 |     |
| 10                 | V2    |                        | CF33A-L | S    | 2   | 1                                        | 1        | 1-4     | 0.5/9.5-1/19         | 1-2       | >64 (R)   | NT                    | 0.12-0.25 | 2       | 0.008-0.015 |     |
| 10                 | V3    |                        | CF78A-L | S    | 2   | 0.25                                     | 4-8 (I)  | 2-4     | 0.5/9.5-1/19         | 0.25-0.5  | 0.25-0.5  | NT                    | 0.25      | 1       | 0.015       |     |
| 10                 | V3    |                        | CF78A-S | S    | 2   | 0.25                                     | 4-16 (I) | 1-2     | 0.5/9.5              | 0.25-0.5  | 0.25-0.5  | NT                    | 0.12      | 1       | 0.015       | M   |
| 10                 | V3    |                        | CF78B-S | S    | 2   | 0.12-0.25                                | 8-16 (I) | 4       | 1/19                 | 0.12-0.25 | 0.25      | NT                    | 0.12      | 1       | 0.008-0.015 | H   |
| 10                 | V1    | CF18E-L                |         | T    | 1   | 1                                        | 1        | 0.5-1   | 0.25/4.8             | 0.25      | 0.25      | <0.06                 | 0.12-0.25 | 1-4     | 0.004-0.015 |     |
|                    |       |                        |         |      |     |                                          |          |         |                      |           |           |                       |           |         |             |     |
| 11                 | V1    | CF19A-L                |         | T    | 1   | 0.5-1                                    | 1        | 0.5-1   | 0.03/0.6             | 4-8 (R)   | 0.12-0.25 | 0.12                  | 0.12-0.25 | 1-2     | 0.008-0.015 |     |
| 11                 | V1    | CF19B-L                |         | U    | 1   | 0.5                                      | 2        | 2       | 0.06/1.2             | 4 (R)     | 0.12      | 0.12                  | 0.12-0.25 | 2-4     | 0.008       |     |
| 11                 | V1    | CF19A-S                |         | V    | 1   | 1                                        | >32 (R)  | >32 (R) | 0.25/4.8             | 1         | 0.25      | 0.12                  | 0.06-0.25 | 1-2     | 0.008-0.015 | U   |
| 11                 | V2    | CF41A-L                |         | W    | 1   | 0.5                                      | 2-4      | 2       | 0.06/1.2             | 16 (R)    | 64 (R)    | NT                    | 0.25      | 2-4     | 0.03-0.06   |     |
| 11                 | V2    |                        | CF41A-S | W    | 1   | 0.5                                      | 1-8 (I)  | 2-4     | 0.5/9.5-1/19         | 16 (R)    | 0.5       | NT                    | 0.12      | 2       | 0.015-0.03  | U   |
| 11                 | V3    | CF58A-L                |         | X    | 1   | 0.25-1                                   | >32 (R)  | >32 (R) | >8/152 (R)           | 1         | 0.25      | NT                    | 0.12      | 2       | 0.015       |     |
| 11                 | V3    | CF58B-L                |         | Y    | 1   | 0.5-1                                    | 8 (I)    | 4       | 0.5/9.5              | 32 (R)    | 0.25-2    | NT                    | 0.25-0.5  | 2-4     | 0.03        |     |
|                    |       |                        |         |      |     |                                          |          |         |                      |           |           |                       |           |         |             |     |
| 12                 | V1    | CF22A-L                |         | Z    | 1   | 0.5-1                                    | 0.5-4    | 0.5     | 0.12/2.4             | 0.25-0.5  | 0.25      | 0.06                  | 0.12      | 1-2     | 0.015-0.06  |     |
|                    |       |                        |         |      |     |                                          |          |         |                      |           |           |                       |           |         |             |     |
| 13                 | V1    | CF29A-L                |         | AA   | 1   | 0.5                                      | 8 (I)    | 4-8 (I) | 0.06/1.2             | 0.25      | 0.25      | >32 (R)               | 0.12-0.25 | 1-4     | 0.008-0.015 |     |
|                    |       |                        |         |      |     |                                          |          |         |                      |           |           |                       |           |         |             |     |
| 14                 | V1    | CF35A-L                |         | K    | 2   | >128 (R)                                 | 1        | 1       | 0.06/1.2             | >64 (R)   | >64 (R)   | 0.12 (R) <sup>c</sup> | 0.12      | 2-4     | 0.015-0.03  |     |
| 14                 | V2    |                        | CF77A-L | K    | 2   | >128 (R)                                 | 1-2      | 1-2     | 1/19                 | >64 (R)   | >64 (R)   | NT                    | 0.25-1    | 1-2     | 0.03-0.06   |     |
|                    |       |                        |         |      |     |                                          |          |         |                      |           |           |                       |           |         |             |     |
| 15                 | V1    | CF43A-L                |         | BB   | 3   | 2                                        | 0.5-1    | 1       | 0.12/2.4             | 8 (R)     | >64 (R)   | >32 (R)               | 0.12      | 1-2     | 0.004-0.008 |     |
| 15                 | V1    | CF43B-L                |         | CC   | 3   | 1                                        | 2        | 1-2     | 0.06/1.2             | 4-16 (R)  | >64 (R)   | >32 (R)               | 0.25      | 2       | 0.008       |     |
|                    |       |                        |         |      |     |                                          |          |         |                      |           |           |                       |           |         |             |     |
| 16                 | V1    | CF50A-L                |         | K    | 2   | >128 (R)                                 | >32 (R)  | 1       | 0.5/9.5              | >64 (R)   | >64 (R)   | 0.12                  | 0.25-0.5  | 2       | 0.015-0.03  |     |
| 16                 | V1    |                        | CF50A-S | K    | 2   | >128 (R)                                 | >32 (R)  | 4-8 (I) | 1/19                 | >64 (R)   | >64 (R)   | 0.12                  | 0.25-0.5  | 2-4     | 0.03        | H   |
| 16                 | V2    | CF111A-L               |         | DD   | 2   | 64 (R)                                   | >32 (R)  | 1-2     | 0.25/4.8             | >64 (R)   | >64 (R)   | NT                    | 0.25      | 1-2     | 0.015       |     |
|                    |       |                        |         |      |     |                                          |          |         |                      |           |           |                       |           |         |             |     |
| 17                 | V2    | CF86A-S                |         | EE   | 2   | 0.25                                     | 2-4      | 0.5-1   | 1/19                 | 0.5       | 0.25      | NT                    | >16 (R)   | 1-2     | 0.015-0.03  | H   |
|                    |       |                        |         |      |     |                                          |          |         |                      |           |           |                       |           |         |             |     |
| 18                 | V1    | CF81A-L                |         | FF   | 3   | 2                                        | 0.5      | 0.5     | 0.12/2.4             | 0.25      | 0.25-0.5  | 0.12-0.25             | 0.12-1    | 1-2     | 0.015       |     |
| 18                 | V2    | CF91A-L                |         | GG   | 1   | 0.5                                      | 1        | 0.5     | 0.12/2.4             | 0.25      | 0.12-0.25 | NT                    | 0.12      | 4 (I)   | 0.015-0.03  |     |
|                    |       |                        |         |      |     |                                          |          |         |                      |           |           |                       |           |         |             |     |
| total: 77 isolates |       | MIC range              |         |      |     | 0.12-128                                 | 0.25-32  | 0.25-32 | 0.03/0.6- 8/152      | 0.12-64   | 0.03-64   | 0.06-32               | 0.03-16   | 0.5-4.0 | 0.002-0.12  |     |
|                    |       | MIC50                  |         |      |     | 0.5                                      | 8        | 2       | 0.25/4.75            | 1         | 0.5       | 0.12                  | 0.25      | 2       | 0.03        |     |
|                    |       | MIC90                  |         |      |     | >128                                     | >32      | >32     | 1/19                 | >64       | >64       | >32                   | 1         | 4       | 0.06        |     |
|                    |       | % resistant (R/tested) |         |      |     | 16                                       | 27       | 13      | 5                    | 36        | 38        | 30                    | 1         | 0       | 0           |     |
