# Supplementary material for: Staphylococcus aureus Small-Colony Variants from Airways of Adult Cystic Fibrosis Patients as Precursors of Adaptive Antibiotic-Resistant Mutations
Source: MDPI journal article supplement (doi:10.3390/antibiotics12061069), 2023-06-17
Supplement: s1 [file s1]

**Table S2.** Possible SCV-inducing high-impact SNP mutations found in isolates CF5C-S and CF48B-S of unknown auxotrophy.

| Isolate | Patient/Visit | Gene altered <i>vs.</i> related prototypical isolate                                                                  | Mutation found          |
|---------|---------------|-----------------------------------------------------------------------------------------------------------------------|-------------------------|
| CF5C-S  | 4/V1          | NWMN_2298 <i>cysG</i> ; uroporphyrin-III C-methyl transferase<br>Pathway altered: Porphyrin metabolism                | 16>17insGGTT;<br>Tyr6fs |
| CF48B-S | 7/V3          | NWMN_0911 <i>menA</i> ; 1,4-dihydroxy-2-naphthoate octaprenyltransferase<br>Pathway altered: Menaquinone biosynthesis | 133G>T;<br>Glu45*       |
