# Supplementary material for: Staphylococcus aureus Small-Colony Variants from Airways of Adult Cystic Fibrosis Patients as Precursors of Adaptive Antibiotic-Resistant Mutations
Source: MDPI journal article supplement (doi:10.3390/antibiotics12061069), 2023-06-17
Supplement: s1 [file s1]

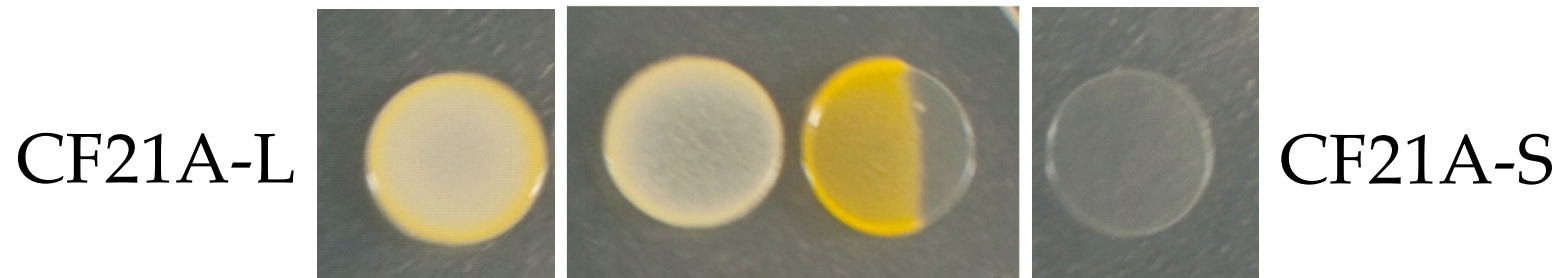

**Figure S1. Auxotrophy complementation of a SCV by its co-isolated prototypical isolate.** The prototypical isolate CF21A-L from patient 7 complements for growth and pigmentation the genetically-related SCV CF21A-S when bacteria are grown side by side on a TSA plate.
