# Supplementary material for: Staphylococcus aureus Small-Colony Variants from Airways of Adult Cystic Fibrosis Patients as Precursors of Adaptive Antibiotic-Resistant Mutations
Source: Antibiotics (Basel). 2023 Jun 17;12(6):1069. doi: 10.3390/antibiotics12061069 (PMC10294822; doi:10.3390/antibiotics12061069)
Supplement: Supplementary file 1 [file antibiotics-12-01069-s001.zip]

Archive with 4 entries (4 files):
- Figure S1_Auxotrophy complementation.pdf
- TABLE S1_Detailed ntibiotic MIC.pdf
- TableS2_reviewfinal.pdf
- TableS3_review.pdf
